# Supplementary material for: Exploring metabolic engineering design principles for the photosynthetic production of lactic acid by Synechocystis sp. PCC6803
Source: PubMed Central journal article supplement (PMC4078008; doi:10.1186/1754-6834-7-99), 2014-06-26
Supplement: 1754-6834-7-99-S1.pdf [file 1754-6834-7-99-S1.pdf]

## Additional file

Exploring metabolic engineering design principles for the photosynthetic production of lactic acid by *Synechocystis* sp. PCC6803

S. Andreas Angermayr<sup>†1</sup>, Aniek D. van der Woude<sup>†2</sup>, Danilo Correddu<sup>1,2</sup>, Angie Vreugdenhil<sup>2</sup>, Valeria Verrone<sup>1</sup>, Klaas J. Hellingwerf<sup>1,2\*</sup>

<sup>†</sup> Equal contribution

<sup>1</sup> Molecular Microbial Physiology Group, Swammerdam Institute for Life Sciences, University of Amsterdam and Netherlands Institute of Systems Biology, The Netherlands

<sup>2</sup> Photanol B.V., Roeterstraat 35, Amsterdam, The Netherlands

\* Corresponding author at: Swammerdam Institute for Life Sciences, Science Park 904, 1098 XH Amsterdam, The Netherlands, tel: +31-20-5257055, e-mail: [K.J.Hellingwerf@uva.nl](mailto:K.J.Hellingwerf@uva.nl)

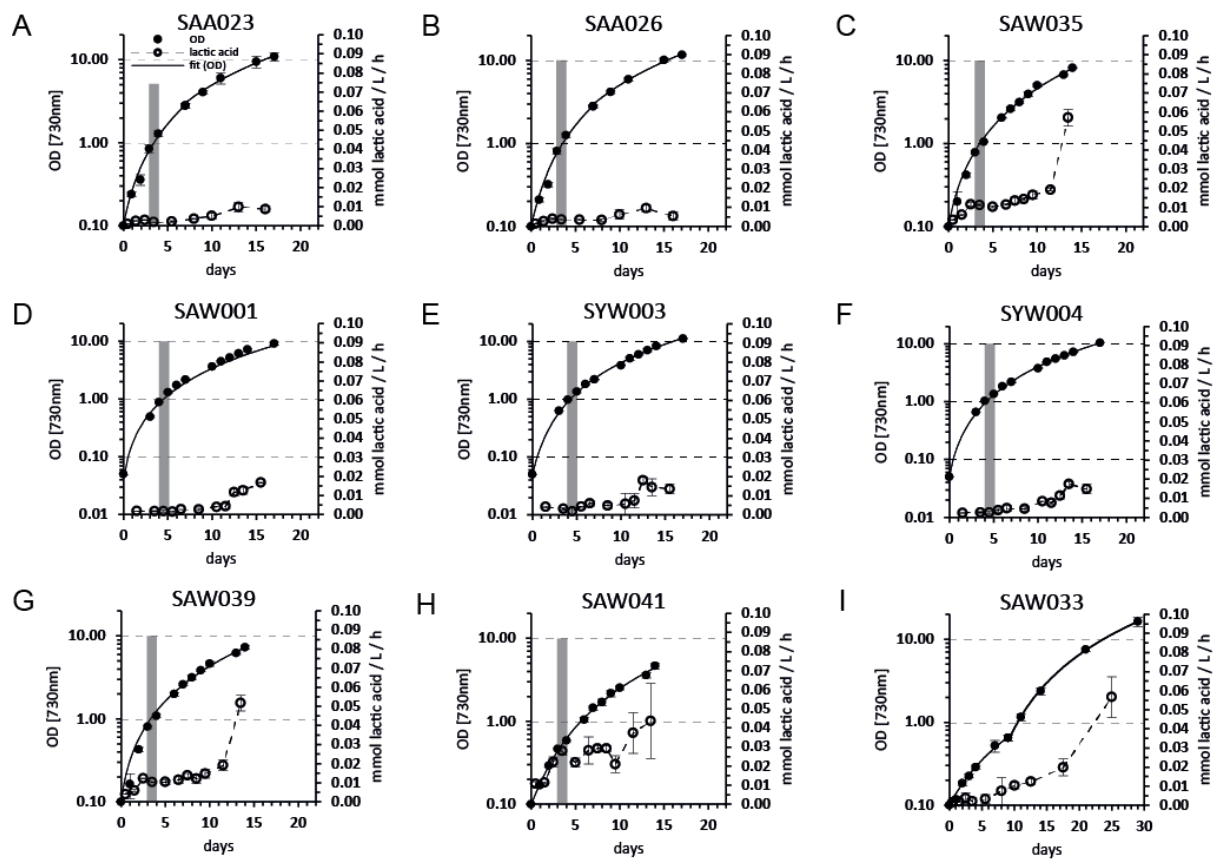

**Figure S1. Growth and rate of lactic acid production in *Synechocystis* mutants.** (A-I) OD<sub>730</sub> values were used as a proxy for growth (left ordinate). The rate of lactic acid production is given in mmol lactic acid/L/h (right ordinate). A 2<sup>nd</sup> order polynomial regression was used to fit the growth data, to achieve smoothing. As introduced in [1] the grey bars indicate the ‘linear growth phase’ (compare Figure S5) used to correlate enzymatic activity and production rates for the metabolic control analysis (MCA). Error bars represent the SD of biological replicates (n = 3), except for SAW001, SYW003, and SYW004 where n = 2; if error bars are not visible they are smaller than the data point symbol.

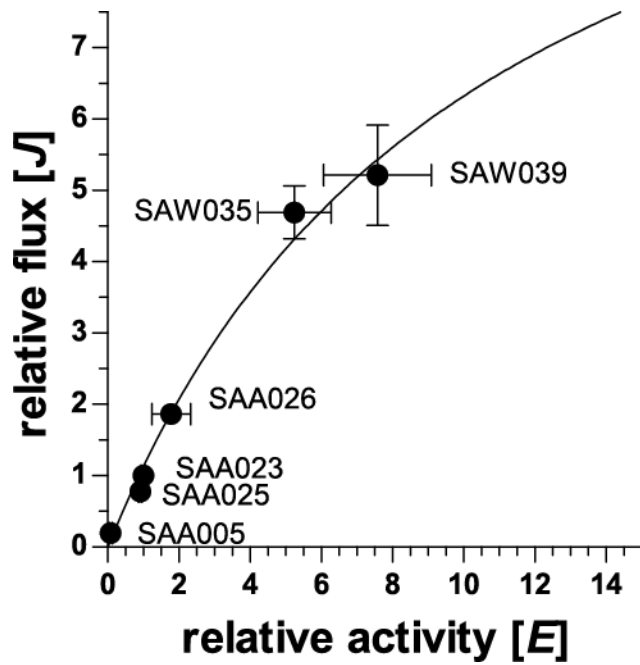

**Figure S2. Non-linear regression employing a rectangular hyperbola (Michaelis-Menten fit) [2] to fit the relation between the relative activity of the heterologously expressed LDH and the resulting rate of lactic acid production.** Prism 5 (GraphPad software) was used with least square optimization.  $Y=(B_{\max} * X)/(K_d + X)$ ;  $B_{\max}=12.99 (\pm 3.291)$ ;  $K_d=10.54 (\pm 4.109)$ ;  $R^2=0.9878$ .

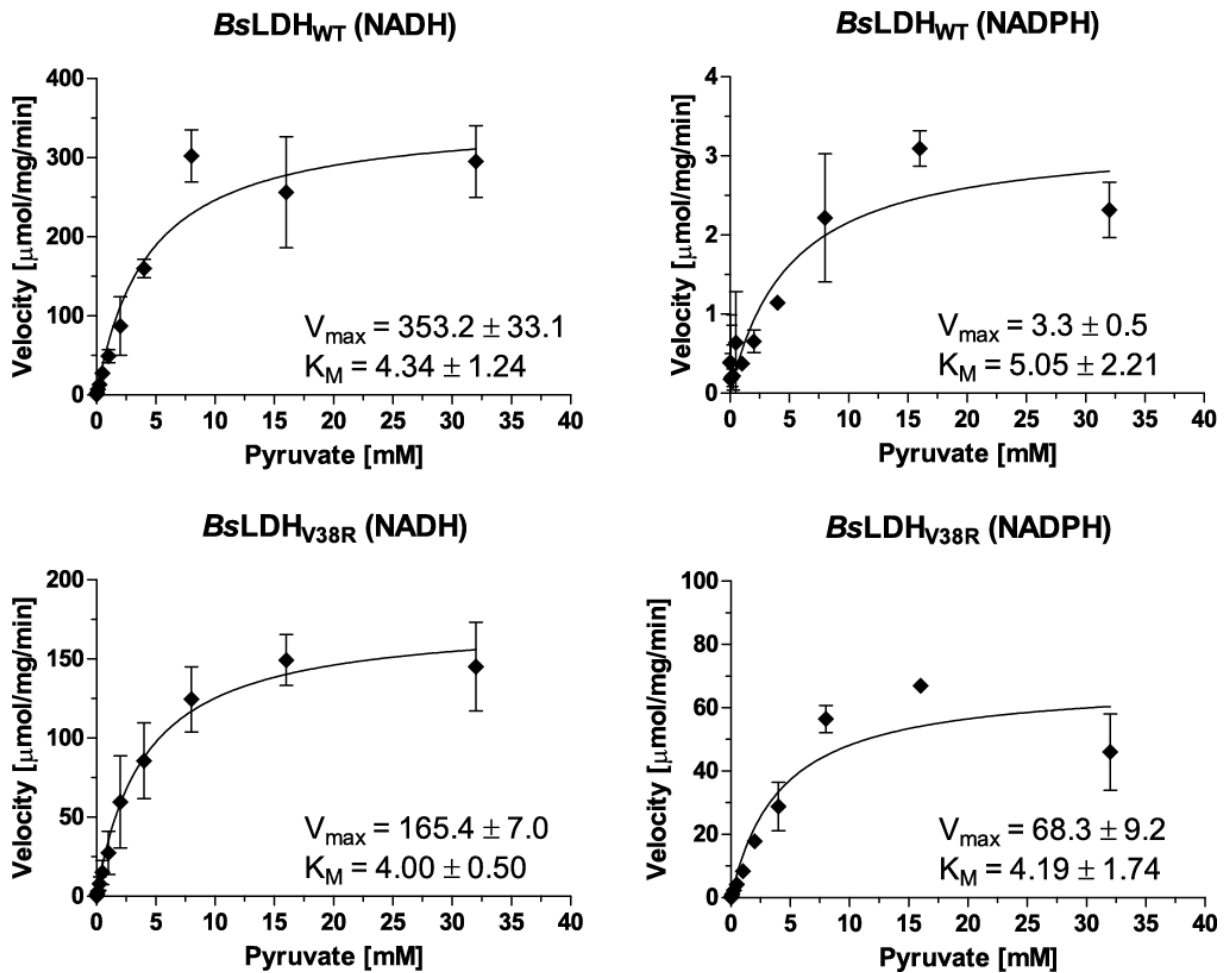

**Figure S3.**  $K_M$  determination of the purified *B. subtilis* LDHs  $BsLDH_{\text{WT}}$  and  $BsLDH_{\text{V38R}}$ . The V38R mutation leads to an increase of LDH activity with NADPH as the co-factor. The  $K_M$  for pyruvate does not change significantly due to this mutation. Errors and error bars represent the SEM ( $n = 3$ ); if error bars are not visible they are smaller than the data point symbol.

```

                                ↓ ↓ ↓
Plasmodium_ovale                -----VLVGS GMIGGVMATLIVQKNL-GDVMVFDVKNMPLG
Champocephalus_gunnari          MSTKEKLI SHVMKEE PVGSR SKVTVVGVGMVGMASAI SILLKDL CDE LAMVDV MEDK LKG
Lactococcus_lactis              -----MADKQRKKVILVGDGAVGSSYAFALVNQGI AQELGIVD LFK EKTQG
Bacillus_subtilis168           -----M NKHVNKVALI GAGFVGS SYAFALINQGITDELVVIDV NKEKAMG
                                ::* * :* * : : : : : : : * : : *

Plasmodium_ovale                KALDTSHTNVMAYSNCQVTGSNTYEDLKGADVIVTAGFTKAPGKSDKEWNRDDLPLNN
Champocephalus_gunnari          EVMDLQHGSFLK--TKIVGDKDYSVTANSKVVVVVTAGARQQEGESRL-----NLVQRNV
Lactococcus_lactis              DAEDLSHALAFTS--PKKIYSADYSDASDADLVVLTSGAPQKPGETRL-----DLVEKNL
Bacillus_subtilis168           DVMDLNHGKAFAP-QPVKTSYGTIEDCKDADIVCICAGANQKPGETRL-----ELVEKNL
                                .. * .* : * . : : * : : * : * : : * : *

Plasmodium_ovale                KIMIEIGGHIKNYCPNAFIIIVTNPADVMVQLLHQHSGVSKNKIVGLGGVLDTSRLKYYI
Champocephalus_gunnari          NIFKFIIPNIVKYSPNCILMVSNPVDILTYVAWKLSGFPRHRVIGSGTNLDSARFRHLI
Lactococcus_lactis              RITKDVVTKIVASGFKGIFLVAANPVDILTYATWKFSGFPKPNRVVGSSTLDTARFRQAL
Bacillus_subtilis168           KIFKGI VSEVMASGFDGIFLVATNPVDILTYATWKFSGLPKERVIGSGTTLDSARFRFML
                                .* : : . : : : : * * . : : : * * * : : : :

Plasmodium_ovale                SQKLNVCPRDVNAHIVGAHGKMMVVLKRYITVGGIPLQEFINNKI--TDAELDAIFDRT
Champocephalus_gunnari          GEKLLHLPSSCHAWIVGEHGDSSVPVWSGVNVAGVSLQGLNPMQGTGEGDENWKA IHKRV
Lactococcus_lactis              AEKVDVDARS IHAYIMGEHGDSEFAVWSHANVAGVKLEQWFQENDYL-NEAEIVELFESV
Bacillus_subtilis168           SEYFGAAPQNVHAHII GEHGDTELPVWSHANVGGVPVSELVEKNDAY-KQEELDQIVDDV
                                : . . . * * * * . : . * . * : : : : : : : . .

Plasmodium_ovale                VNTALEIVNYHASPYPVAPAAAI IEMAESYLKDLKVKLICSTLLEGQYGH-TGVFGGTPLV
Champocephalus_gunnari          VDGAYEVIKLKGYSWAIGMSVADLVE SIIKNMHKVHPVSTLVQGMHGKDE VFLSVPCV
Lactococcus_lactis              RDAAYSIIAKKGATFYGVAVALARITKAILDDEHAVLPVSVFQDQYGV S-DCYLGQPAV
Bacillus_subtilis168           KNAAYHII EKKGATYYGVAMSLARITKAILHNENSILTVSTYLDGQY GAD-DVYIGVPAV
                                : * : : . . : : : : : . * : * : : . * *

Plasmodium_ovale                LGCNGVEQVFELQLNAEEKMFDDAI-----
Champocephalus_gunnari          LGNSGLTDVIHMTLKAEEKQLQKSAETLWGVQKELTL-----
Lactococcus_lactis              VGAEGVVPNIHIPLNDAEMQKMEASGAQLKAIIDEAFAKEEFASAVKN
Bacillus_subtilis168           VNRGGIAGITELNLNEKEKEQFLHSAGVLKNIILKPHFAEQKVN-----
                                : * : . : * * : : : :

```

**Figure S4. Alignment of selected LDH enzymes.** Protein sequences were aligned using ClustalW2. The highly conserved GXGXXG<sub>19</sub>D motif in the Rossmann fold is indicated with arrows. The valine or (iso)leucine that was changed into an arginine to change cofactor specificity is marked in yellow.

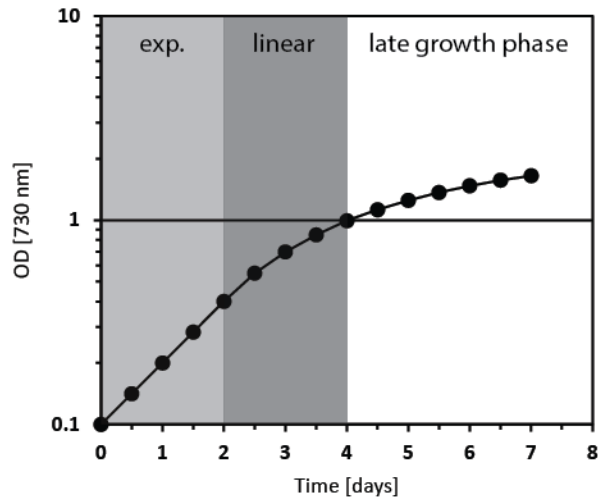

**Figure S5. Schematic interpretation of the subsequent growth phases in a batch culture of *Synechocystis*.** A typical *Synechocystis* batch culture in BG-11 medium, cultivated at moderate light intensity (for details: see the Material and Methods section) initially shows an exponential growth phase (exp.) which gradually transits into a linear growth phase, because of increased cellular self-shading. After this linear growth phase, cells enter the late growth phase, in which additional limitations (e.g. for carbon or phosphate [3]) take place. We have selected the linear growth phase as the reference phase for calculation of the production characteristics of batch cultures of *Synechocystis*.

**Table S1. Primers used in this study.**

| Name                    | Sequence*                                       | Additional Information                             |
|-------------------------|-------------------------------------------------|----------------------------------------------------|
| H1seq_F                 | AATGGTCCCAAATTGTC                               | Colony PCR segregation at <i>slr0168</i> insertion |
| H2seq_R                 | CTGTGGGTAGTAAACTGGC                             | Colony PCR segregation at <i>slr0168</i> insertion |
| KanF_back_Seq           | TCCCGTTGAATATGGCTC                              | Colony PCR <i>slr0168</i> insertion                |
| coLILDH_seq_R           | AAGTCTTCGGCATCACCTTG                            | Colony PCR <i>Llldh</i> insertion                  |
| Synpyk seq R            | GGCCTGCATATCTTTAATGG                            | Colony PCR <i>Synpk</i> insertion                  |
| Efpyk seq R             | GGAATTTCAACACCCATGTC                            | Colony PCR <i>Efpk</i> insertion                   |
| ECpyk seq R             | GAGGCTTCCAAGATTTTCGTC                           | Colony PCR <i>Ecpk</i> insertion                   |
| LLpyk seq R             | TCGGCGGCTTCAATAATTC                             | Colony PCR <i>Llpk</i> insertion                   |
| SpecR_out_F             | CCGAGGCATAGACTGTACCC                            | Colony PCR <i>pDF</i> insertion                    |
| Ppc-H1- <i>SacII</i> -F | <u>CCC</u> <u>GAG</u> CTCGTTGCCCTCATAGAGCACC    | <i>ppc</i> deletion                                |
| Ppc-H1- <i>NotI</i> -R  | CCC <u>GCGGCCG</u> CGTACAAGATACTACGGGATT        | <i>ppc</i> deletion                                |
| Ppc-H2- <i>XhoI</i> -F  | <u>CCCCTCGAG</u> CGTGC GTTACCGTCGTTATTC         | <i>ppc</i> deletion                                |
| Ppc-H2- <i>KpnI</i> -R  | <u>CCC</u> <u>GTAC</u> CCACGTTATGCCCGGTTCTG     | <i>ppc</i> deletion                                |
| dPPC_check_F            | TTGGCCGGATAAACCAATAA                            | Colony PCR <i>ppc</i> deletion                     |
| PPC_check_R             | GATTCCGTTGTTGCTCGTTT                            | Colony PCR <i>ppc</i> deletion                     |
| ppc_back_R              | AGTCCCCGCAGTAGTTCTT                             | Colony PCR <i>ppc</i> deletion                     |
| coLILDH_mt_L39R_F       | AAGAATTGGGTATTGTGGACCGGTTTAAAGAAAAACCCAAGG      | Introduction L39R mutation in <i>LILDH</i>         |
| coLILDH_mt_L39R_R       | CCTTGGGTTTTTTCTTTAAACCGGTCCACAATACCCAATTCTT     | Introduction L39R mutation in <i>LILDH</i>         |
| coBsLDH_Nde_R           | <u>CATATGA</u> ACAAGCACGTCAATAAAGT              | Cloning of <i>Bsldh</i> in pET28b+                 |
| coBsLDH_HE_R            | <u>GATATCAAGCTT</u> CTGCAGCGG                   | Cloning of <i>Bsldh</i> in pET28b+                 |
| coChgLDH_Nde_F          | AAT <u>CATATGAG</u> CACCAAGAGAAGTTAAT           | Cloning of <i>Cgldh</i> in pET28b+                 |
| coChgLDH_HE_R           | AAT <u>GATATCAAGCTT</u> CTGCAGCGG               | Cloning of <i>Cgldh</i> in pET28b+                 |
| coBsLDH_R38V_F          | ACGAGTTAGTTGTCATTGATGTAACAAA<br>GAAAGGCTATGGG   | Removal V38R mutation in <i>BsLDH</i>              |
| coBsLDH_R38V_R          | CCCATAGCCTTTTCTTTGTTTACATCAATG<br>ACAACAACTCGT  | Removal V38R mutation in <i>BsLDH</i>              |
| coChgLDH_R53V_F         | ACGAATTAGCTATGGTGGATGTGATGGAA<br>GACAAGTTGAAGGG | Removal V53R mutation in <i>ChLDH</i>              |
| coChgLDH_R53V_R         | CCCTTCAACTTGTCTTCCATCACATCCACC<br>ATAGCTAATTCGT | Removal V53R mutation in <i>ChLDH</i>              |
| T7_FW                   | TAATACGACTCACTATAGGG                            | Verification of pET28b+                            |
| T7_RV                   | GCTAGTTATTGCTCAGCGG                             | Verification of pET28b+                            |
| coBsLDH_Nde_F           | AAT <u>CATATGA</u> ACAAGCACGTCAATAAAGTG         | Cloning of <i>Bsldh</i>                            |
| coBsLDH_Bam_R           | AAT <u>GGATC</u> CTTAATTGACTTTCTGTTTCAGCGAA     | Cloning of <i>Bsldh</i>                            |
| coChgLDH_Nde_F          | AAT <u>CATATGAG</u> CACCAAGAGAAGTTAATCTCC       | Cloning of <i>Cgldh</i>                            |
| coChgLDH_Bam_R          | AAT <u>GGATC</u> CTTACAAGGTCAATTCTTTTTGCACTC    | Cloning of <i>Cgldh</i>                            |
| Str_Sal_F_R             | AAT <u>GTCGAC</u> GGTGATTGATTGAGCAAGCTTT        | Construction of pHSB                               |

\* anchoring restriction sites are underlined

**Table S2. *E. coli* strains and plasmids used in this study.**

| Strain/plasmid             | Precursor          | * | Relevant Insert(s) or resulting genotype**                                                                 | Application                            | Reference                                                 |
|----------------------------|--------------------|---|------------------------------------------------------------------------------------------------------------|----------------------------------------|-----------------------------------------------------------|
| <i>E. coli</i> XL-1 blue   |                    | - | <i>Tet<sup>R</sup></i>                                                                                     | Standard cloning host                  | Stratagene                                                |
| <i>E. coli</i> EPI400      |                    | - |                                                                                                            | CopyCutter™ cells for cloning          | Epicentre                                                 |
| <i>E. coli</i> BL-21 (DE3) |                    | - |                                                                                                            | Protein production host                | Novagen                                                   |
| pHKH001                    | pBluescript II SK+ | - | $\Delta$ <i>slr0168::Kan<sup>R</sup>, Amp<sup>R</sup></i>                                                  | Insertion at <i>slr0168</i>            | [4]                                                       |
| pHKH020                    | pHKH001            | - | <i>Ptrc1::L<sub>1</sub>ldh<sub>co</sub>::tt::Kan<sup>R</sup></i>                                           | Strain SAA023                          | [1]                                                       |
| pHKH003                    | pHKH001            | - | <i>Ptrc1::L<sub>1</sub>ldh<sub>na</sub>::tt::Kan<sup>R</sup></i>                                           | Strain SAA025                          | [1]                                                       |
| pYW001                     | pHKH001            | S | <i>Ptrc2::Synpk<sub>co</sub>::tt::Ptrc2::L<sub>1</sub>ldh<sub>co</sub>::tt::Kan<sup>R</sup></i>            | Strain SYW001                          | This study                                                |
| pYW002                     | pHKH001            | S | <i>Ptrc2::B<sub>3</sub>pk<sub>co</sub>::tt::Ptrc2::L<sub>1</sub>ldh<sub>co</sub>::tt::Kan<sup>R</sup></i>  |                                        | This study                                                |
| pYW003                     | pHKH001            | S | <i>Ptrc2::E<sub>1</sub>pk<sub>co</sub>::tt::Ptrc2::L<sub>1</sub>ldh<sub>co</sub>::tt::Kan<sup>R</sup></i>  | Strain SYW003                          | This study                                                |
| pYW004                     | pHKH001            | S | <i>Ptrc2::E<sub>2</sub>pk<sub>co</sub>::tt::Ptrc2::L<sub>1</sub>ldh<sub>co</sub>::tt::Kan<sup>R</sup></i>  | Strain SYW004                          | This study                                                |
| pYW005                     | pHKH001            | S | <i>Ptrc2::L<sub>1</sub>pk<sub>co</sub>::tt::Ptrc2::L<sub>1</sub>ldh<sub>co</sub>::tt::Kan<sup>R</sup></i>  | Strain SYW005                          | This study                                                |
| pYW010                     | pHKH001            | S | <i>Ptrc1::Synpk<sub>co</sub>::tt::Ptrc1::L<sub>1</sub>ldh<sub>co</sub>::tt::Kan<sup>R</sup></i>            | pDC001                                 | This study                                                |
| pAW001                     | pYW001             | C | <i>tt::Ptrc2::L<sub>1</sub>ldh<sub>co</sub>::Kan<sup>R</sup></i>                                           | Strain SAW001                          | This study                                                |
| pAV001                     | pHKH020            | C | <i>Ptrc1::L<sub>1</sub>ldh<sub>co</sub>L39R::tt::Kan<sup>R</sup></i>                                       | Strain SAV001                          | This study                                                |
| pSB1AC3                    |                    | - | <i>Amp<sup>R</sup>, Cm<sup>R</sup></i>                                                                     | Standard BioBrick plasmid backbone     | <a href="http://parts.igem.org">http://parts.igem.org</a> |
| pSB1AC3_TT                 | pSB1AC3            |   | <i>BBa_B0014 (tt), Amp<sup>R</sup>, Cm<sup>R</sup></i>                                                     | Standard BioBrick plasmid              | <a href="http://parts.igem.org">http://parts.igem.org</a> |
| pAC_LDH                    | pSB1AC3            | C | <i>Ptrc1::L<sub>1</sub>ldh<sub>na</sub>::tt</i>                                                            | pAA026                                 | This study                                                |
| pDC001                     | pYW010 + pACLDH    | C | <i>Ptrc1::L<sub>1</sub>ldh<sub>na</sub>::tt::Ptrc1::L<sub>1</sub>ldh<sub>co</sub>::tt::Kan<sup>R</sup></i> | Strain SAA026                          | This study                                                |
| pAA027                     | pAA028             | C | <i>Ptrc1::B<sub>3</sub>ldh<sub>co</sub>::tt::Kan<sup>R</sup></i>                                           | Strain SAA027                          | This study                                                |
| pAA028                     | pHKH001            | S | <i>Ptrc1::B<sub>3</sub>ldh<sub>co</sub>V38R::tt::Kan<sup>R</sup></i>                                       | Strain SAA028                          | This study                                                |
| pET28b+                    |                    | - | <i>Kan<sup>R</sup></i>                                                                                     | Standard cloning and expression vector | Novagen                                                   |
| pETBsLDHw                  | pETBsLDHm          | C | <i>B<sub>3</sub>ldh<sub>co</sub></i>                                                                       | His-Tag purification of BsLDH          | This study                                                |



|           |                    |   |                                                                                 |                                                     |            |
|-----------|--------------------|---|---------------------------------------------------------------------------------|-----------------------------------------------------|------------|
| pETBsLDHm | pAA028             | C | <i>Bsldh<sub>co</sub>V38R</i>                                                   | His-Tag purification of <i>BsLDH<sub>V38R</sub></i> | This study |
| pAA029    | pAA030             | C | <i>P<sub>trc1</sub>::C<sub>g</sub>ldh<sub>co</sub>::tt::Kan<sup>R</sup></i>     | Strain SAA029                                       | This study |
| pAA030    | pHKH001            | S | <i>P<sub>trc1</sub>::C<sub>g</sub>ldh<sub>co</sub>V53R::tt::Kan<sup>R</sup></i> | Strain SAA030                                       | This study |
| pAA035    | pHKH001            | S | <i>P<sub>trc1</sub>::P<sub>o</sub>ldh<sub>co</sub>I29R::tt::Kan<sup>R</sup></i> | Strain SAA035                                       | This study |
| pDF_lac   | RSF1010 derivative | - | <i>lacI, Strep<sup>R</sup></i>                                                  | Self-replicating plasmid                            | [5]        |
| pDF_LDH   | pDF_lac            | C | <i>P<sub>trc2</sub>::Lldh<sub>co</sub>::tt, Strep<sup>R</sup></i>               | Strains SAW035, SAW039, SAW041                      | This study |
| pHSH      | pHKH001            | C | <i>Strep<sup>R</sup></i>                                                        | Insertion at <i>slr0168</i>                         | This study |
| pAW010    | pBluescript        | C | <i>Strep<sup>R</sup></i> – homologous regions surrounding <i>ppc</i>            | <i>ppc</i> deletion                                 | This study |

\* S: directly synthesized and sub-cloned at Genscript (NJ, USA), C: derived from cloning procedures, -: previously described, see reference.

\*\* *Tet<sup>R</sup>*: tetracyclin resistance, *Kan<sup>R</sup>*: kanamycin resistance cassette, *Strep<sup>R</sup>*: streptomycin/spectinomycin resistance cassette, *Amp<sup>R</sup>*: ampicillin resistance cassette, *Cm<sup>R</sup>*: chloramphenicol resistance cassette, *P<sub>trc1</sub>*: *trc1* promoter, *P<sub>trc2</sub>*: *trc2* promoter, *tt*: transcriptional terminator (BBA\_B0014), *co*: codon-optimized, *na*: native, *Ll*: *L. lactis*, *Bs*: *B. subtilis*, *Syn*: *Synechocystis*, *Ec*: *E. coli*, *Ef*: *E. faecalis*, *Cg*: *C. gunnari*, *Po*: *P. ovale*.

## References

1. Angermayr SA, Hellingwerf KJ: **On the use of metabolic control analysis in the optimization of cyanobacterial biosolar cell factories.** *J Phys Chem B* 2013, **117**:11169–11175.
2. Fell DA: **Metabolic control analysis: a survey of its theoretical and experimental development.** *Biochem J* 1992, **286**(Pt 2):313–330.
3. Kim HW, Vannela R, Zhou C, Rittmann BE: **Nutrient acquisition and limitation for the photoautotrophic growth of *Synechocystis* sp. PCC6803 as a renewable biomass source.** *Biotechnol Bioeng* 2011, **108**:277–285.
4. Angermayr SA, Paszota M, Hellingwerf KJ: **Engineering a cyanobacterial cell factory for production of lactic acid.** *Appl Environ Microbiol* 2012, **78**:7098–7106.
5. Guerrero F, Carbonell V, Cossu M, Correddu D, Jones PR: **Ethylene synthesis and regulated expression of recombinant protein in *Synechocystis* sp. PCC 6803.** *PLoS ONE* 2012, **7**:e50470.
